1       **Molecular pathway analysis indicates a distinct metabolic and**  
2       **immune phenotype in women with right-sided colon cancer.**

3  
4       **Authors**

5       Yazhi Sun<sup>1</sup>, Varvara Mironova<sup>1,2</sup>, Ying Chen<sup>1</sup>, Elliott P.F. Lundh<sup>1</sup>, Qian Zhang<sup>1</sup>, Yuping Cai<sup>1</sup>,  
6       Vasilis Vasiliou<sup>1</sup>, Yawei Zhang<sup>1,3</sup>, Rolando Garcia-Milian<sup>1,4</sup>, Sajid A. Khan<sup>2</sup>, Caroline H.  
7       Johnson<sup>1\*</sup>

8  
9       **Affiliations:** <sup>1</sup>Department of Environmental Health Sciences, Yale School of Public Health,  
10       Yale University, New Haven, CT USA, <sup>2</sup>Department of Surgery, Section of Surgical Oncology,  
11       Yale University School of Medicine, New Haven, CT, USA. <sup>3</sup>Department of Surgery, Yale  
12       University School of Medicine, New Haven, CT, USA, <sup>4</sup>Bioinformatics Support Program,  
13       Cushing/Whitney Medical Library, Yale School of Medicine, New Haven, CT, USA.

14  
15       **\*Corresponding author:** [caroline.johnson@yale.edu](mailto:caroline.johnson@yale.edu)

16  
17  
18  
19  
20  
21  
22  
23  
24  
25  
26  
27  
28  
29  
30  
31  
32  
33

34 **Abstract**

35 Colon cancer is the third most commonly diagnosed cancer in the United States. Recent reports  
36 have shown that the location of the primary tumor is of clinical importance. Patients with right-  
37 sided cancers (RCCs) (tumors arising between the cecum and proximal transverse colon) have  
38 poorer clinical outcomes than those with left-sided colon cancers (LCCs) (tumors arising  
39 between the distal transverse colon and sigmoid colon, excluding the rectum). Interestingly,  
40 women have a lower incidence of colon cancer than men do. However, women have a higher  
41 propensity for RCC than men. Identification of gene expression differences between RCC and  
42 LCC is considered a potential means of prognostication. Furthermore, studying colon cancer  
43 sidedness could reveal important predictive markers for response to various treatments. This  
44 study provides a comprehensive bioinformatic analysis of various genes and molecular  
45 pathways that correlated with sex and anatomical location of colon cancer using four publicly  
46 available annotated datasets housed in the National Center for Biotechnology Information's  
47 Gene Expression Omnibus (GEO). We identified differentially expressed genes in tumor  
48 tissues from women with RCC, which showed attenuated energy and nutrient metabolism when  
49 compared to women with LCC. Specifically, we showed that the downregulation of 5' AMP-  
50 activated protein kinase alpha subunit (*AMPK $\alpha$* ) and downregulated anti-tumor immune  
51 response in women with RCC. This difference was not seen when comparing tumor tissues  
52 from men with RCC to men with LCC. Therefore, women with RCC may have a specific  
53 metabolic and immune phenotype which accounts for differences in prognosis and treatment  
54 response.

55

56 **Keywords:** Right-sided colon cancer, enrichment analysis, autophagy, gene expression, sex-  
57 differences

58

59

60

61

62

63

64

65

66

67

68

69

70

71

## 72 *Introduction*

73 Colon cancer is the third most commonly diagnosed cancer, and the second leading cause of  
74 cancer-related death in the United States (Aran et al., 2016; Siegel et al., 2017). The incidence  
75 and mortality rate of colon cancer has been steadily declining for past several years in Western  
76 countries. This is primarily due to advances in screening programs and lifestyle changes  
77 (Hagggar and Boushey, 2009; Waly and Ali, 2018). Colonoscopy and fecal-occult blood tests  
78 are the most commonly used screening tools that have shown a significant reduction in  
79 incidence and mortality. However, the incidence of colon cancer continues to increase in  
80 countries that are transitioning into high-income economies, such as Eastern Asia countries and  
81 Eastern European countries. This is possibly due to adoption of Westernized diets that are high  
82 in fat and various environmental exposures (Larsson et al., 2005; Hagggar and Boushey, 2009).  
83 Despite the decrease in incidence rate in Western countries and the development of techniques  
84 that have improved diagnosis and treatment of colon cancer in recent years, mortality is still  
85 high (14.8 per 100,000 person). Worldwide mortality rate is approximately half that of the  
86 incidence rate (Hagggar and Boushey, 2009; Lee et al., 2017b).

87 Recent reports have shown that the location of the primary tumor is of clinical  
88 importance (Gervaz et al., 2016). The left and right side of the colon have distinct embryologic  
89 origins, vasculature, and differing gene expression patterns (Gervaz et al., 2004). Furthermore,  
90 the two sides of the colon have different exposures to environmental compounds, microbiome  
91 density, and metabolite distribution (Lee et al., 2017a). Cancer stemming from these two  
92 regions are known to exhibit different epidemiological, histological and clinical characteristics  
93 (Lee et al., 2017b). For instance, patients with right-sided colon cancers (RCCs) (tumors arising  
94 between the cecum and proximal transverse colon) are more likely to be women, of more  
95 advanced age, and have worse clinical outcomes compared to those with left-sided colon  
96 cancers (LCCs) (tumors arising between the distal transverse colon and sigmoid colon,  
97 excluding the rectum) (Benedix et al., 2010; Lee et al., 2017b). Therefore, the pathophysiology  
98 that control RCC versus LCC are likely different, but, at present, not well characterized. Studies  
99 that examine location of colon cancer, particularly in women with RCC, are needed to improve  
100 existing preventative and therapeutic options for these patients.

101 Bioinformatics approaches for analyzing genome-wide transcriptomic data can assess  
102 the relationship between gene expression and causal mechanisms, and are enabling  
103 interpretation of these high-dimensional datasets. Enrichment analysis, for example, evaluates  
104 high-dimensional data at the level of gene sets, and provides a large-scale comparison at the  
105 molecular pathway and disease process level instead of examining individual genes  
106 (Subramanian et al., 2005). In a recent paper, an enrichment analyses of gene expression  
107 correlation between RCC and LCC patients was carried out using the GSE14333 dataset from  
108 the public database National Center for Biotechnology Information Gene Expression Omnibus  
109 (GEO) (Peng et al., 2018). The study revealed molecular pathways that were differentially  
110 correlated with tumor development in these two regions of the colon. However, in this study,  
111 only one population cohort was examined and did not correct for multiple comparison testing  
112 (Peng et al., 2018). Another study used data from both the Cancer Genome Atlas (TCGA) and  
113 GSE14333 to examine somatic mutations, genome-wide mRNA and miRNA, and DNA  
114 methylation profiles associated with RCC and found a correlation in the phosphoinositide 3-

115 kinase (PI3K) signaling pathway (Hu et al., 2018).

116 In the present study, we retrieved gene expression profiles of patients with colon cancer  
117 from four GEO datasets to identify significant gene expression differences and their  
118 reproducibility between men and women with RCC and LCC. We identified groups of related  
119 genes residing in one or multiple molecular pathways that were commonly altered in women  
120 and men with RCC or LCC using enrichment analysis, and showed reproducibility of results  
121 between the datasets. Thus, we identified molecular differences between primary colon tumor  
122 location in men and women, and generated hypotheses pertaining to the causal mechanisms for  
123 clinical and epidemiological differences between these groups of samples.

124

## 125 ***Materials and Methods***

### 126 **Data collection**

127 Gene expression profiles were retrieved from the public database GEO, including microarray  
128 datasets GSE41258, GSE39582, GSE37892, and GSE14333. GSE41258 was generated using  
129 the GPL96 platform for transcriptome analysis (Affymetrix Human Genome U133A array),  
130 while the other datasets were generated using the GPL570 platform (Affymetrix Human  
131 Genome U133Plus 2.0 arrays). The GPL570 platform is an updated version of GPL96, with  
132 the addition of 6,500 genes. All datasets were downloaded from the GEO database in Qlucore  
133 Omics Explorer (Version 3.3, Qlucore AB, Lund, Sweden).

134

### 135 **Sample selection and inclusion criteria**

136 To stratify samples by anatomical location, we defined RCC cases using the ontology terms  
137 “right”, “ascending”, “cecum”, “hepatic flexure”. For LCC terms “distal”, “descending”,  
138 “sigmoid”, “splenic flexure” were used. Only primary tumor samples were selected including  
139 those recorded as “carcinoma” and “adenocarcinoma”. Furthermore, only those samples  
140 annotated with information regarding patient sex were considered. Samples that fell out of  
141 these strict inclusion criteria bounds were excluded from the study. The four selected datasets  
142 had more than 100 samples each remaining after application of the inclusion/exclusion criteria  
143 (Table 1). Qlucore Omics Explorer was used for data selection and categorizing (Version 3.3,  
144 Qlucore AB, Lund, Sweden).

145

### 146 **Analysis of patient characteristics**

147 Selected sample annotation files were exported from Qlucore Omics Explorer and analyzed in  
148 SAS software (SAS Institute Inc., Cary, NC, USA). The mean age of patients was compared to  
149 sex and cancer anatomical location (student’s t-test,  $p < 0.05$  statistically significant). We also  
150 used Ingenuity Pathway Analysis (IPA) for additional pathway analysis between women with  
151 RCC and LCC.

152

## 153 **Identification of differentially expressed genes**

154 All gene expression data was log-transformed in Qlucore Omics Explorer to stabilize the  
155 variance, compress the range of data, and normalize the distribution of the data. Student's t-  
156 test was used comparing women with RCC as the selected group to women with LCC to obtain  
157 differentially expressed genes specific to cancer location. We also compared women with RCC  
158 to men with RCC to investigate the influence of sex on gene expression. Results were thus  
159 differentially expressed with respect to women with RCC. Then we calculated adjusted p-  
160 values (Benjamini-Hochberg False Discovery Rate) to account for multiple comparisons, and  
161 log<sub>2</sub> transformed fold change for each gene.

162

## 163 **Pathway analysis and comparison for reproducibility**

164 Pathway analysis was conducted using MetaCore™ software (GeneGo, San Diego, CA) which  
165 is a systems biology analysis suite to identify altered gene functions and pathways. The  
166 Affymetrix Human Genome U133A Array was used for probe set annotations. The  
167 differentially expressed gene lists with adjusted p-value and log<sub>2</sub> transformed were uploaded  
168 with a threshold of q-value < 0.1. The results of the enrichment analysis provided pathway  
169 maps, which were determined to be of statistical significance using a FDR < 0.05. We also used  
170 Ingenuity Pathway Analysis (IPA, QIAGEN Redwood City, USA) to look for additional  
171 pathways as MetaCore™ and IPA have different knowledge bases and may reveal possible  
172 differences in regulation of different signaling pathways related to colon cancer.

173 IPA network analysis was used to map differentially expressed genes between women  
174 with RCC and LCC. Differentially expressed genes, which interact with other molecules in the  
175 Ingenuity Knowledge Base, are identified as network-eligible molecules. These serve as  
176 "seeds" for generating networks (green are down regulated; red are upregulated) through the  
177 IPA network generating algorithm. Network-eligible molecules are combined into networks  
178 that maximize their interconnectedness with each other relative to all molecules they are  
179 connected to in the Ingenuity Knowledge Base. Generated networks are scored based on the  
180 probability of finding observed number of network-eligible molecules in a given network by  
181 random chance.

182

## 183 **Results**

### 184 **Patient characteristics**

185 For each publicly available dataset obtained from GEO, information regarding platform type,  
186 sample size and patient characteristics can be observed on Table 1. The mean age of all patients  
187 with RCC was higher than all patients with LCC across all datasets but only reached statistical  
188 significance in GSE14333 (p-value < 0.001), see Table 2. This is in accordance with previous  
189 studies (Gonzalez et al., 2001; Benedix et al., 2010). The mean age of women with all cancer  
190 locations compared to men was also only statistically significantly higher in GSE14333 (p-  
191 value 0.006).

192

## 193 **Principal component analysis (PCA) of all differentially expressed genes across the group** 194 **comparisons**

195 We carried out PCA analysis of gene expression profiles from tumor tissues taken from women  
196 with RCC. These profiles showed some separation from women with LCC and from men with  
197 RCC in the GSE41258 dataset (Figures 1A and 1B). Figure 1A shows the PCA scores plot of  
198 data from GSE41258 comparing gene expression values from women with RCC to women  
199 with LCC,  $q$ -value  $< 0.1$ . Similarly, Figure 1B shows a PCA comparing women with RCC and  
200 men with RCC ( $q$ -value  $< 0.1$  by student's  $t$ -test). Overall, the PCA models revealed that there  
201 are differences in gene expression between the sample groups, however the maximal difference  
202 appears to be between women and men with RCC compared to women with RCC and LCC.

203

## 204 **Identification of differently expressed genes between RCCs and LCCs in women and men**

205 Three datasets (GSE39582, GSE14333 and GSE41258) were observed to have statistically  
206 significant differences in gene expression between tumors in women with RCC and LCC after  
207 correction for multiple comparisons. Table 3 shows the genes that are reproducibly  
208 dysregulated in  $\geq 2$  datasets. Many of the genes had fold changes of  $\geq 2$  ( $\log_2FC \geq 1$  or  $\leq -1$ )  
209 when comparing women with RCC to women with LCC. These included AT-Rich Interaction  
210 Domain 3A (*ARID3A*), Special AT-Rich Sequence-Binding Protein 2 (*SATB2*), and Troponin  
211 C2 Fast Skeletal Type (*TNNC2*), which were downregulated in women with RCC. Conversely,  
212 homeobox C6 (*HOXC6*) was upregulated in women with RCC.

213 To determine whether the differences in gene expression between RCCs and LCCs  
214 were sex-specific, we compared gene expression profiles in men with RCC and LCC (Table  
215 4). Again, gene expression data from GSE39582, GSE14333 and GSE41258 revealed  
216 differences that were statistically significant, although the number of genes identified was  
217 reduced from the comparison of woman with RCC to women with LCC. Of note, *HOXC6* was  
218 upregulated, and mucin 12 (*MUC12*) and Prostate Cancer Susceptibility Candidate 1 (*PRAC1*)  
219 were downregulated in both men and women with RCC when comparing to LCCs.

220 Gene expression in tumors from women with RCC was compared to those in tumors  
221 from men with RCC, and four datasets were observed to have statistically significant  
222 differentially expressed genes after correcting for multiple comparisons (Table 5). Many of the  
223 genes had large fold changes of  $>2$ , including DEAD-Box Helicase 3, Y-Linked (*DDX3Y*),  
224 Lysine Demethylase 5D (*KDM5D*), Ribosomal Protein S4, Y-Linked 1 (*RPS4Y1*), Ubiquitin  
225 Specific Peptidase 9, Y-Linked (*USP9Y*), Eukaryotic Translation Initiation Factor 1A, Y-  
226 Linked (*EIF1AY*), which were all downregulated; and X Inactive Specific Transcript (*XIST*),  
227 which was upregulated in women with RCC. To determine whether this was a trend for RCC  
228 patients, we also compared women with LCC to men with LCC (Table 6). The same genes  
229 were altered in women compared to men with RCC versus women and men with LCC. All  
230 genes identified as differentially expressed between men and women were located on either X  
231 or Y chromosomes and their differential expression frequently occurred in X and Y pairs; i.e.  
232 Zinc Finger Protein, X-Linked (*ZFX*) and ZF Y-Linked (*ZFY*), *RPS4X* and *RPS4Y1*, *EIF1AX*  
233 and *EIF1AY*.

234 To understand how the lists of differentially expressed genes are linked to the biology

235 and mechanisms of tumor growth and patient survival in women and men with RCC and LCC,  
236 we performed enrichment analysis in MetaCore™ software to examine their connectivity in  
237 molecular pathways. We also utilized IPA software to identify genetic interplay.

238

### 239 **Enrichment analysis of patients with RCC compared to LCC**

240 Enrichment analysis of differentially expressed genes in women with RCC compared to women  
241 with LCC revealed six enriched molecular pathways (FDR <0.05) as illustrated in Figure 2A.  
242 We did not identify differentially expressed genes in men with RCC compared to men with  
243 LCC with enriched pathway analysis, possibly due to the low number of differentially  
244 expressed genes initially identified.

245 The top significant pathway enriched in women with RCC was the protein kinase A  
246 (PKA) pathway (Figure 3). This role of PKA is to phosphorylate and regulate protein activity.  
247 PKA is a holoenzyme complex composed of catalytic (PKA-cat) and regulatory (PKA-reg)  
248 subunits. PKA-regs exist as two forms: type I (PKA-reg) and type II (PKA-reg type II). When  
249 cyclic adenosine monophosphate (cAMP) is bound to PKA-regs, their affinity to PKA-cat is  
250 lowered. The PKA holoenzyme thus dissociates and releases PKA-cat to carry out protein  
251 phosphorylation. We observed that *PKA-reg* and *PKA-reg type II* expression were  
252 downregulated in women with RCC compared to women with LCC causing a potential  
253 activation of PKA-cat. This was also supported by the decrease seen in protein kinase inhibitor  
254 alpha (*PKI*) which when active inhibits PKA. However, an upregulation in Meprin A subunit  
255 beta, which is an inhibitor of PKA catalysis, could affect its activity. Interestingly, increased  
256 expression of this gene has been associated with increased cell migration and invasion; thus,  
257 its upregulation supports the poorer outcomes seen in RCCs (Wang et al., 2016). Additional  
258 genes that were changed in the datasets included cGMP-inhibited 3'-5'-cyclic  
259 phosphodiesterase A (*PDE3A*), which was downregulated. Phosphodiesterases regulate cAMP  
260 levels through hydrolysis to produce AMP, therefore downregulation of *PDE3A* indicates  
261 decreased cleavage of the phosphodiester bond in cAMP. Increased cAMP levels have been  
262 shown to be protective against colon cancer (Tsukahara et al., 2013). As cAMP negatively  
263 regulates *PKA-reg* this further supports the downregulation of this gene. Protein phosphatase  
264 2 (*PP2A*) expression was also increased, which can lead to increased cell survival in RCC  
265 through 5-hydroxytryptamine receptor 1A signaling and may have possible actions on the  
266 androgen receptor (Dai et al., 2017).

267 The sirtuin (SIRT) 6 pathway was also significantly enriched in women with RCC  
268 (Figure 4). One of the roles of sirtuin 6 is to promote an increase in the AMP/ATP ratio, thus  
269 regulating energy metabolism in the cancer cell and important metabolic processes in the cell.  
270 In our analysis, we observed that 5' AMP-activated protein kinase alpha subunit (*AMPK $\alpha$* ) was  
271 significantly downregulated, which plays a key role in controlling the AMP/ATP ratio. In  
272 addition, expression of acyl-coenzyme A oxidase 1 (*ACOX1*), glucokinase (*HXK4*), and Indian  
273 hedgehog (*LHH*) genes, all regulated by SIRT6, were decreased. These genes control the  
274 synthesis of macromolecules required for cell growth through glucose and fatty acids  
275 catabolism and have roles in cellular senescence. Forkhead box O3 (*FOXO3A*) was  
276 downregulated, and STIP1 homology and U-box containing protein 1 (*CHIP*) was upregulated,

277 which also have roles in decreasing sirtuin 6 expression and indicates decreased activation of  
278 *FOXO3A* by SIRT1. Interestingly, SIRT1 has been implicated in the regulation of cancer cell  
279 proliferation through regulation of sex steroid hormones (Moore et al., 2012).

280 The enrichment of the carbohydrate-responsive element-binding protein (ChREBP)  
281 pathway points again to changes in nutrient supply. ChREBP is inhibited by cAMP and PKA,  
282 here we observed that *PKA-cat* is activated (due to downregulation of *PKA-reg*), which would  
283 decrease phosphorylation and activation of ChREBP. We also observed that *AMPK $\alpha$*  is  
284 significantly downregulated along with acyl-coenzyme A synthetase (*ACS*) (Figure 5), which  
285 would conversely cause ChREBP activation. Deregulation of these genes as a response to  
286 nutrient supply suggests a role for ChREBP-mediated glucose and fatty acid metabolic control  
287 and may play a role in cell proliferation. The mammalian target of rapamycin complex 1  
288 (*mTORC1*) signaling pathway was also enriched (Figure 6) suggesting a nutrient deplete  
289 environment in women with RCC. Tubulin tyrosine ligase 1 (*TTL1*) and *AMPK $\alpha$*  were both  
290 downregulated in women with RCC. mTOR regulation is known to play a role in colon cancer  
291 biology (Kimmelman and White, 2017).

292 The ATP metabolic pathway was found to be significantly altered (Figure 7). *PDE3A*  
293 and ectonucleotide pyrophosphatase/phosphodiesterase 1 (*ENPP1*) were downregulated,  
294 whereas pyruvate kinase muscle isozyme M2 (*PKM2*) and *PDE10A* were upregulated.  
295 Downregulation of ENPP1 and PDE3A indicates decreased breakdown of ATP and cAMP  
296 respectively, to generate AMP, also increased PKM2 indicates increased ATP production from  
297 the metabolism of phosphoenolpyruvate and ADP to pyruvate. Therefore, this pathway also  
298 substantiates widespread disruption to AMP and ATP generation.

299 One other distinct mechanism showing significant enrichment in RCC compared to  
300 LCCs in women was antigen presentation by major histocompatibility complex class I (Figure  
301 8). All the genes from our datasets that were linked through this pathway were upregulated,  
302 suggesting an increase in activity in this pathway; heat shock protein (*HSP*)70, hypoxia up-  
303 regulated protein 1 (*HYOUI*), and *CHIP* partake in antigen endocytosis, antigen presentation,  
304 and T-cell immune response. Of note, the protein encoded by *HYOUI* belongs to the *HSP70*  
305 family, which has been shown to be related to cell growth and cancer progression (Jagadish et  
306 al., 2016). Interestingly, *HSP105*, a member of the *HSP70* family that has been shown to play  
307 a role in anti-tumor immune response, was downregulated (Miyazaki et al., 2005; Yokomine  
308 et al., 2006; Yokomine et al., 2007).

309 We also used IPA network analysis to identify significant differentially expressed gene  
310 pathways between with women RCC and LCC and revealed possible differences in the  
311 regulation of signaling pathways related to cancer cell death and apoptosis (Figure 9). Gene  
312 expression differences included the downregulation of protein O-fucosyltransferase 1  
313 (*POFUT1*), which is a key factor in the Notch1 (*NOTCH1*) signaling pathway. This pathway  
314 is an important regulator for cell death and has been associated with poorer prognosis  
315 (Chabanais et al., 2018). Notch 1 known to be essential for maintenance of normal intestinal  
316 epithelium and is activated in primary colorectal cancer (CRC) rather than metastatic colon  
317 cancer, it may therefore may be more important for early CRC development (Suman et al.,  
318 2014). It has also been shown that AMPK depletion can reduce Notch 1 levels (Mohini and  
319 Rangarajan, 2018). Although Notch1 is associated with poorer prognosis, our study may imply



320 that Notch1 is not an important factor in RCC versus LCC outcomes. The myelocytomatosis  
321 viral oncogene homolog (MYC) and MYC/MAX heterodimer, which play a role in apoptosis,  
322 were also downregulated suggesting inhibition of apoptosis. Suppression of MYC has been  
323 associated with oxygen and glucose-deprived conditions, and could be a route of cancer cell  
324 survival under nutrient depletion (Okuyama et al., 2010). Caspase 6 (*CASP6*), a protease that  
325 plays an important role in apoptosis, was also found to be downregulated in women with RCC.  
326 Other involved pathways include the p38 MAPK signaling pathway, a regulator of cell  
327 metabolism, proliferation, and invasion/inflammation, and aryl hydrocarbon receptor signaling  
328 pathways, which has shown to be involved in tumorigenesis. Thus, clear differences in the  
329 expression of genes related to cell growth were seen between RCC and LCC cases in women  
330 that could be related to differences in nutrient supply.

331

### 332 **Enrichment analysis of patients with RCC comparing men to women**

333 There were two significantly enriched pathways seen in all datasets from women with RCC  
334 when comparing to men with RCC and were related to expression of genes involved in  
335 regulation of transcription and translation (Figure 2B). When comparing men and women with  
336 LCC, we saw similar enrichments of these pathways (Transcription\_Epigenetic regulation of  
337 gene expression; p-value (-log) 3.44, Translation\_Regulation of translation initiation; p-value  
338 (-log) 2.33). The genes that underlie the variation in expression between men and women are  
339 located on either chromosome X or Y, thus it is not surprising that differences between these  
340 genes are identified when comparing men to women. An example of this can be seen when  
341 comparing the *EIF1A* genes. *EIF1AY* is upregulated in men when comparing differences  
342 between the two sexes in either RCC or LCC patients. However, most of the genes identified  
343 have links to cancer and reveal the importance of their increased or decreased expression in  
344 this disease.

345

### 346 **Discussion**

347 Identification of differentially expressed genes and pathways in RCC and LCC is a potentially  
348 powerful means of prognostication and could provide predictive markers for response to  
349 treatment of colon cancer. In this study, we use multiple publicly available gene expression  
350 datasets to examine gene expression in tumors of right and left sided colon cancer in men and  
351 women and identify statistically significant and clinically relevant differences in signaling  
352 pathways. When comparing women with RCC to women with LCC, there were four genes that  
353 were commonly dysregulated across two or more large datasets and had fold changes >2;  
354 *ARID3A*, *SATB2*, and *TNNC2* that were downregulated in women with RCC, and *HOXC6* that  
355 was upregulated.

356 *ARID3A* codes for a DNA-binding protein and is proposed to be a tumor suppressor;  
357 higher expression of *ARID3A* is correlated with increased overall survival and correlated with  
358 p53 status (Song et al., 2014a; Song et al., 2014b). In addition, high *ARID3A* expression is  
359 more frequently observed in microsatellite-stable (MSS) and microsatellite-unstable (MSI)-low  
360 cases versus MSI-high cases (MSI-high is more often observed in RCC) (Song et al., 2014a).  
361 *SATB2* is a transcription factor that regulates chromatin remodeling and transcription (Mansour

362 et al., 2015). High expression of *SATB2* and *ARID3A* were recently shown to be a biomarker  
363 for favorable prognosis and sensitivity to chemotherapy and radiation of colon cancer and  
364 potential metastasis (Zhang et al., 2018). We found downregulation of these genes in women  
365 with RCC compared to women with LCC, which may play a role in poorer prognosis of this  
366 patient group. Limited publications have yet to discuss the implications of decreased expression  
367 of *TNNC2* in RCCs. However, higher expression has been shown to correlate with decreased  
368 survival (the human protein atlas/TCGA data).

369 *HOXC6*, a transcription factor belonging to the family of human homeobox (*HOX*)  
370 genes that control cell morphogenesis and differentiation during embryological development,  
371 known to be expressed in differential gradients to establish cranio-caudal (head to tail)  
372 polarization. *HOXC6* is also known to be overexpressed in numerous cancer types. Specifically,  
373 it is associated with poor survival in colon cancer patients. Upregulation of this gene, which  
374 was found to be upregulated in our study in both men and women with RCC, has been shown  
375 to correlate with poor overall survival in right sided colon cancer, and is thought to promote  
376 carcinogenesis via inhibition of autophagy and mTOR pathway activation (Ji et al., 2016a; Ji  
377 et al., 2016b). We saw upregulation in men and women with RCC compared to LCC, which is  
378 in concordance with prior studies. Interestingly, *HOXC6* modulates androgen receptor (AR)-  
379 stimulated gene expression, and thus, could play a role in hormonal mechanisms in cancer  
380 (Ramachandran et al., 2005).

381 Gene expression profiles from men with RCC and LCC also revealed differences in  
382 gene expression between the two sides of the colon. However, the fold changes and number of  
383 genes observed were less than those seen in women. *HOXC6* was upregulated with fold  
384 change >2 in women with RCC. *MUC12* and *PRAC1* were similarly downregulated in both  
385 men and women when comparing RCCs to LCCs. Recent studies have examined mRNA  
386 expression using data from TCGA and GEO comparing patients with RCC to LCC have  
387 revealed similar changes to *HOXC6*, *PRAC1* and *MUC12* (Hu et al., 2018; Peng et al., 2018).  
388 The *PRAC1* gene is associated with hypermethylation, and reported to be expressed in the  
389 prostate, rectum and left-sided colon. It is also downregulated in patients with prostate cancer  
390 and in immortalized cell lines from RCC patients (Bauer et al., 2012). Downregulation of  
391 *PRAC1* is thought to be repressed *via* hypermethylation of one of the differentially methylated  
392 regions situated on the CpG island shore in RCCs. It is also hypothesized to be a tumor  
393 suppressor gene through its interactions with cotranscribed *HOXB13* (downregulated in women  
394 with RCC when compared to women with LCC in our analysis, but not differentially expressed  
395 in men) (Hu et al., 2018). *MUC12* is one of the *MUC* genes that code for glycoproteins  
396 important for mucosal barrier function, decreased *MUC12* expression has been correlated with  
397 poorer survival for stage II and III CRC patients (Matsuyama et al., 2010).

398 On direct comparison of tumors from women with RCC to men with RCC, fold changes  
399 of >2 were observed in gene expression. However, the genes observed were specific to sex-  
400 chromosomal location (X or Y-linked). Thus, the expression of a Y-chromosomal linked genes  
401 would be expected to be higher in men when comparing to women.

402 Pathway analysis was carried out to identify the relationships between the genes  
403 expressed and their involvement in metabolic pathways to determine biological processes  
404 related to right or left-sided colon cancer in men and women. Only enrichment analysis of

405 differentially expressed genes from women revealed significantly enriched pathways with  
406 respect to tumor location in the colon. The six pathways which are the most highly enriched in  
407 relationship to occurrence of cancer in RCC in women involve signaling, metabolism, and  
408 immune response. Five of the pathways observed are involved in the regulation of essential  
409 nutrients such as glucose and fatty acids, and control the generation of energy metabolites such  
410 as AMP and ATP. There is a clear link between high ATP and cAMP, low AMP, accompanied  
411 by a decrease in *AMPK $\alpha$*  expression in women with RCC. ATP is involved in processes that  
412 mediate all types of cell death including apoptosis, autophagy and necrosis, thus plays a critical  
413 role in the survival of cancer cells (Zhou et al., 2012). *AMPK $\alpha$*  is involved in the regulation of  
414 multiple metabolic functions in the cell, and when activated, it can stimulate glycolysis, inhibit  
415 fatty acid synthesis and promote fatty acid oxidation under conditions of nutrient depletion.  
416 When *AMPK $\alpha$*  is induced under these conditions, it also plays a role in autophagy via  
417 suppression of mTORC1 and activation of unc-51-like autophagy activating kinase 1 (ULK1)  
418 (Inoki et al., 2003). Conversely, pathway analysis also revealed a potential downregulation of  
419 mTORC1 signaling in women with RCC through decreased regulation by *TTL1* expression  
420 (Figure 6). In addition, gene expression analysis revealed an increase in *HOXC6* expression,  
421 which has been shown to be linked to this pathway in CRC cells via the promotion of autophagy  
422 and inhibition of mTOR (Ji et al., 2016a). One of the main roles of mTORC1 is to sense nutrient  
423 availability (primarily amino acids, cellular energy (via AMPK), and oxygen levels) to control  
424 cell growth. When mTORC1 is inactivated it dissociates from the ULK1 complex which in  
425 turn activates ULK1. Activation of ULK1 is essential for autophagy and the involvement of  
426 *AMPK $\alpha$*  in this process is also required (Rabanal-Ruiz et al., 2017). However, it has been  
427 shown that under nutrient deplete conditions, ULK1 can directly phosphorylate and  
428 downregulate AMPK at the  $\alpha$  subunit, thus providing a negative regulatory feedback loop  
429 decreasing autophagy (Loffler et al., 2011), which may explain the differences we observe  
430 within this pathway. An additional examination of *ULK1* and autophagy (*ATG*) gene  
431 expression in the four datasets did not show significant differences between women with RCC  
432 compared to women with LCC, however analysis of mTORC1/ULK1 phosphorylation and  
433 signaling would help to identify the association of autophagy to women with RCC. *FOXO3A*  
434 was also downregulated and highlighted in the SIRT6 pathway. FOXO3 has been implicated  
435 in the transcriptional regulation of autophagy and functions in parallel with the mTOR pathway.  
436 However, unlike mTOR, autophagy by FOXO3 is dependent on the transcriptional  
437 upregulation of multiple autophagy genes such as *ATG12*, *ATG4B*, *VPS34*, *ULK2*, *LC3B*,  
438 *GABARAPL1*, *BECLIN1*, *BNIP3*, and *BNIP3L* those that were measured in the datasets (the  
439 latter six) were not significantly dysregulated.

440 Therefore, due to the potential therapeutic targeting of autophagy in cancer, which can  
441 promote cancer progression, the survival of tumors under stress conditions, and response to  
442 chemotherapeutics, the association of autophagy in women with RCC is worth further  
443 investigation (Mokarram et al., 2017).

444 The other distinct pathway which was enriched in women with RCC compared to LCCs  
445 was immune regulation. This finding is also in agreement with the recent assignment of tumor  
446 subtypes that are associated with sex and colon location (Guinney et al., 2015; Lee et al., 2017a).  
447 Consensus Molecular Subtype (CMS1) tumors, those with high immune infiltration and  
448 activation, were more frequently diagnosed in women with RCC (where their definition of

449 RCC including transverse colon). Whereas CMS3, classified as a metabolically active subtype,  
450 does not appear to be more prevalent in one side of the colon than the other. However, their  
451 classification of LCC included rectum which may influence the difference seen in our findings.  
452 Additionally, we found upregulation of genes encoding heat shock proteins *HSP70* and  
453 downregulation of *HSP105* in women with RCC. These proteins are also involved in immune  
454 response. Upregulation of *HSP70* expression has been shown to increase cell proliferation and  
455 tumor growth, and has been associated with poorer prognosis in colon cancer (Jagadish et al.,  
456 2016). *HSP105* partakes in increasing anti-tumor immune response, which was downregulated  
457 in RCC (Miyazaki et al., 2005; Jagadish et al., 2016). Our findings of the dysregulation of these  
458 heat shock proteins in women with RCC versus LCC may play a role in the more aggressive  
459 nature and generally poorer prognosis of RCC.

460 Therefore, this study provides a comprehensive bioinformatic analysis of differentially  
461 expressed genes and pathways, commonly altered among different sexes and anatomical  
462 locations in colon cancer. It also shows potential therapeutic targets for treatment involving  
463 suppressors and activators in altered pathways. The results lead us to the overall hypothesis  
464 that women with RCC have inactivation of *AMPK $\alpha$* , and a decreased AMP/ATP ratio in their  
465 tumor tissues when compared to women with LCC. This study also highlights the importance  
466 and value of open science by using publicly available datasets to provide novel findings and  
467 prove reproducibility in our findings between datasets.

468

#### 469 **Acknowledgements**

470 The authors would like to thank Women's Health Research at Yale, and the Yale Cancer Center  
471 for funding this project (CJ, SK, YZ). This publication was also made possible by CTSA Grant  
472 Number UL1 TR001863 from the National Center for Advancing Translational Science  
473 (NCATS), components of the National Institutes of Health (NIH), and NIH roadmap for  
474 Medical Research (SK). Its contents are solely the responsibility of the authors and do not  
475 necessarily represent the official view of NIH.

476

#### 477 **Author Contribution Statement**

478 CHJ conceptualized the study, YS, EPFL, RGM, analyzed the data. YS, VM, YC, QZ, YC, YZ,  
479 VV, SAK, CHJ analyzed the results and helped write the publication. YS, VM, YC, RGM,  
480 CHJ helped edit the manuscript and prepare for publication.

481

#### 482 **Conflict of Interest Statement**

483 The authors declare no conflict of interest.

484

#### 485 **References**

486 Aran, V., Victorino, A.P., Thuler, L.C., and Ferreira, C.G. (2016). Colorectal cancer:  
487 epidemiology, disease mechanisms and interventions to reduce onset and mortality.

- 488 *Clinical colorectal cancer* 15(3), 195-203.
- 489 Bauer, K.M., Hummon, A.B., and Buechler, S. (2012). Right-side and left-side colon cancer  
490 follow different pathways to relapse. *Mol Carcinog* 51(5), 411-421. doi:  
491 10.1002/mc.20804.
- 492 Benedix, F., Kube, R., Meyer, F., Schmidt, U., Gastinger, I., Lippert, H., et al. (2010).  
493 Comparison of 17,641 patients with right- and left-sided colon cancer: differences in  
494 epidemiology, perioperative course, histology, and survival. *Diseases of the colon and*  
495 *rectum* 53(1), 57-64. doi: 10.1007/DCR.0b013e3181c703a4 [doi].
- 496 Chabanais, J., Labrousse, F., Chaunavel, A., Germot, A., and Maftah, A. (2018). POFUT1 as a  
497 Promising Novel Biomarker of Colorectal Cancer. *Cancers* 10(11), 411. doi:  
498 10.3390/cancers10110411.
- 499 Dai, C., Zhang, X., Xie, D., Tang, P., Li, C., Zuo, Y., et al. (2017). Targeting PP2A activates  
500 AMPK signaling to inhibit colorectal cancer cells. *Oncotarget* 8(56), 95810-95823. doi:  
501 10.18632/oncotarget.21336.
- 502 Gervaz, P., Bucher, P., and Morel, P. (2004). Two colons-two cancers: paradigm shift and  
503 clinical implications. *J Surg Oncol* 88(4), 261-266. doi: 10.1002/jso.20156.
- 504 Gervaz, P., Usel, M., Rapiti, E., Chappuis, P., Neyroud-Kaspar, I., and Bouchardy, C. (2016).  
505 Right colon cancer: Left behind. *Eur J Surg Oncol* 42(9), 1343-1349. doi:  
506 10.1016/j.ejso.2016.04.002.
- 507 Gonzalez, E.C., Roetzheim, R.G., Ferrante, J.M., and Campbell, R. (2001). Predictors of  
508 proximalvs. distal colorectal cancers. *Diseases of the colon & rectum* 44(2), 251-258.
- 509 Guinney, J., Dienstmann, R., Wang, X., de Reynies, A., Schlicker, A., Soneson, C., et al. (2015).  
510 The consensus molecular subtypes of colorectal cancer. *Nature Medicine* 21(11), 1350-  
511 1356. doi: 10.1038/nm.3967.
- 512 Hagggar, F.A., and Boushey, R.P. (2009). Colorectal cancer epidemiology: incidence, mortality,  
513 survival, and risk factors. *Clinics in colon and rectal surgery* 22(4), 191.
- 514 Hu, W., Yang, Y., Li, X., Huang, M., Xu, F., Ge, W., et al. (2018). Multi-omics Approach  
515 Reveals Distinct Differences in Left- and Right-Sided Colon Cancer. *Mol Cancer Res*  
516 16(3), 476-485. doi: 10.1158/1541-7786.MCR-17-0483.
- 517 Inoki, K., Zhu, T.Q., and Guan, K.L. (2003). TSC2 mediates cellular energy response to control  
518 cell growth and survival. *Cell* 115(5), 577-590. doi: Doi 10.1016/S0092-  
519 8674(03)00929-2.
- 520 Jagadish, N., Parashar, D., Gupta, N., Agarwal, S., Suri, V., Kumar, R., et al. (2016). Heat shock  
521 protein 70-2 (HSP70-2) is a novel therapeutic target for colorectal cancer and is  
522 associated with tumor growth. *BMC cancer* 16, 561-561. doi: 10.1186/s12885-016-  
523 2592-7.
- 524 Ji, M., Feng, Q., He, G., Yang, L., Tang, W., Lao, X., et al. (2016a). Silencing homeobox C6  
525 inhibits colorectal cancer cell proliferation. *Oncotarget* 7(20), 29216-29227. doi:  
526 10.18632/oncotarget.8703.
- 527 Ji, M., Feng, Q., He, G., Yang, L., Tang, W., Lao, X., et al. (2016b). Silencing homeobox C6  
528 inhibits colorectal cancer cell proliferation. *Oncotarget* 7(20), 29216-29227. doi:  
529 10.18632/oncotarget.8703.
- 530 Kimmelman, A.C., and White, E. (2017). Autophagy and Tumor Metabolism. *Cell Metab* 25(5),  
531 1037-1043. doi: 10.1016/j.cmet.2017.04.004.

- 532 Larsson, S.C., Rafter, J., Holmberg, L., Bergkvist, L., and Wolk, A. (2005). Red meat  
533 consumption and risk of cancers of the proximal colon, distal colon and rectum: the  
534 Swedish Mammography Cohort. *International journal of cancer* 113(5), 829-834.
- 535 Lee, M.S., Menter, D.G., and Kopetz, S. (2017a). Right Versus Left Colon Cancer Biology:  
536 Integrating the Consensus Molecular Subtypes. *J Natl Compr Canc Netw* 15(3), 411-  
537 419.
- 538 Lee, M.S., Menter, D.G., and Kopetz, S. (2017b). Right versus left colon cancer biology:  
539 integrating the consensus molecular subtypes. *Journal of the National Comprehensive*  
540 *Cancer Network* 15(3), 411-419.
- 541 Loffler, A.S., Alers, S., Dieterle, A.M., Keppeler, H., Franz-Wachtel, M., Kundu, M., et al.  
542 (2011). Ulk1-mediated phosphorylation of AMPK constitutes a negative regulatory  
543 feedback loop. *Autophagy* 7(7), 696-706.
- 544 Mansour, M.A., Hyodo, T., Ito, S., Kurita, K., Kokuryo, T., Uehara, K., et al. (2015). SATB2  
545 suppresses the progression of colorectal cancer cells via inactivation of MEK5/ERK5  
546 signaling. *FEBS J* 282(8), 1394-1405. doi: 10.1111/febs.13227.
- 547 Matsuyama, T., Ishikawa, T., Mogushi, K., Yoshida, T., Iida, S., Uetake, H., et al. (2010).  
548 MUC12 mRNA expression is an independent marker of prognosis in stage II and stage  
549 III colorectal cancer. *Int J Cancer* 127(10), 2292-2299. doi: 10.1002/ijc.25256.
- 550 Miyazaki, M., Nakatsura, T., Yokomine, K., Senju, S., Monji, M., Hosaka, S., et al. (2005).  
551 DNA vaccination of HSP105 leads to tumor rejection of colorectal cancer and  
552 melanoma in mice through activation of both CD4+ T cells and CD8+ T cells. *Cancer*  
553 *Science* 96(10), 695-705. doi: 10.1111/j.1349-7006.2005.00093.x.
- 554 Mohini, L., and Rangarajan, A. (2018). AMPK promotes Notch1 stability to potentiate  
555 hypoxia-induced breast cancer stemness and drug resistance. *bioRxiv*, 458489. doi:  
556 10.1101/458489.
- 557 Mokarram, P., Albokashy, M., Zarghooni, M., Moosavi, M.A., Sepehri, Z., Chen, Q.M., et al.  
558 (2017). New frontiers in the treatment of colorectal cancer: Autophagy and the unfolded  
559 protein response as promising targets. *Autophagy* 13(5), 781-819. doi:  
560 10.1080/15548627.2017.1290751.
- 561 Moore, R.L., Dai, Y., and Faller, D.V. (2012). Sirtuin 1 (SIRT1) and steroid hormone receptor  
562 activity in cancer. *J Endocrinol* 213(1), 37-48. doi: 10.1530/JOE-11-0217.
- 563 Okuyama, H., Endo, H., Akashika, T., Kato, K., and Inoue, M. (2010). Downregulation of c-  
564 MYC protein levels contributes to cancer cell survival under dual deficiency of oxygen  
565 and glucose. *Cancer Res* 70(24), 10213-10223. doi: 10.1158/0008-5472.CAN-10-2720.
- 566 Peng, Q., Lin, K., Chang, T., Zou, L., Xing, P., Shen, Y., et al. (2018). Identification of genomic  
567 expression differences between right-sided and left-sided colon cancer based on  
568 bioinformatics analysis. *Onco Targets Ther* 11, 609-618. doi: 10.2147/OTT.S154207.
- 569 Rabanal-Ruiz, Y., Otten, E.G., and Korolchuk, V.I. (2017). mTORC1 as the main gateway to  
570 autophagy. *Essays Biochem* 61(6), 565-584. doi: 10.1042/EBC20170027.
- 571 Ramachandran, S., Liu, P., Young, A.N., Yin-Goen, Q., Lim, S.D., Laycock, N., et al. (2005).  
572 Loss of HOXC6 expression induces apoptosis in prostate cancer cells. *Oncogene* 24(1),  
573 188-198. doi: 10.1038/sj.onc.1207906.
- 574 Siegel, R.L., Miller, K.D., Fedewa, S.A., Ahnen, D.J., Meester, R.G.S., Barzi, A., et al. (2017).  
575 Colorectal cancer statistics, 2017. *CA: a cancer journal for clinicians* 67(3), 177-193.

- 576 Song, M., Kim, H., Kim, W.K., Hong, S.P., Lee, C., and Kim, H. (2014a). High expression of  
577 AT-rich interactive domain 3A (ARID3A) is associated with good prognosis in  
578 colorectal carcinoma. *Ann Surg Oncol* 21 Suppl 4, S481-489. doi: 10.1245/s10434-013-  
579 3435-2.
- 580 Song, M., Kim, H., Kim, W.K., Hong, S.P., Lee, C., and Kim, H. (2014b). High Expression of  
581 AT-Rich Interactive Domain 3A (ARID3A) is Associated with Good Prognosis in  
582 Colorectal Carcinoma. *Annals of Surgical Oncology* 21(4), 481-489. doi:  
583 10.1245/s10434-013-3435-2.
- 584 Subramanian, A., Tamayo, P., Mootha, V.K., Mukherjee, S., Ebert, B.L., Gillette, M.A., et al.  
585 (2005). Gene set enrichment analysis: A knowledge-based approach for interpreting  
586 genome-wide expression profiles. *Proceedings of the National Academy of Sciences of*  
587 *the United States of America* 102(43), 15545-15550. doi: 10.1073/pnas.0506580102.
- 588 Suman, S., Das, T.P., Ankem, M.K., and Damodaran, C. (2014). Targeting Notch Signaling in  
589 Colorectal Cancer. *Curr Colorectal Cancer Rep* 10(4), 411-416. doi: 10.1007/s11888-  
590 014-0252-3.
- 591 Tsukahara, T., Matsuda, Y., and Haniu, H. (2013). Cyclic Phosphatidic Acid Stimulates cAMP  
592 Production and Inhibits Growth in Human Colon Cancer Cells. *PLOS ONE* 8(11),  
593 e81139. doi: 10.1371/journal.pone.0081139.
- 594 Waly, M.I., and Ali, A. (2018). "Nutrition and Colorectal Cancer Pathogenesis," in *Bioactive*  
595 *Components, Diet and Medical Treatment in Cancer Prevention*. Springer), 111-120.
- 596 Wang, X., Chen, J., Wang, J., Yu, F., Zhao, S., Zhang, Y., et al. (2016). Metalloproteases  
597 meprin- $\alpha$  (MEP1A) is a prognostic biomarker and promotes proliferation and invasion  
598 of colorectal cancer. *BMC cancer* 16, 383-383. doi: 10.1186/s12885-016-2460-5.
- 599 Yokomine, K., Nakatsura, T., Minohara, M., Kira, J.-i., Kubo, T., Sasaki, Y., et al. (2006).  
600 Immunization with heat shock protein 105-pulsed dendritic cells leads to tumor  
601 rejection in mice. *Biochemical and Biophysical Research Communications* 343(1), 269-  
602 278. doi: <https://doi.org/10.1016/j.bbrc.2006.02.142>.
- 603 Yokomine, K., Nakatsura, T., Senju, S., Nakagata, N., Minohara, M., Kira, J.i., et al. (2007).  
604 Regression of intestinal adenomas by vaccination with heat shock protein 105-pulsed  
605 bone marrow-derived dendritic cells in ApcMin/+ mice. *Cancer Science* 98(12), 1930-  
606 1935. doi: 10.1111/j.1349-7006.2007.00612.x.
- 607 Zhang, Y.J., Chen, J.W., He, X.S., Zhang, H.Z., Ling, Y.H., Wen, J.H., et al. (2018). SATB2 is  
608 a Promising Biomarker for Identifying a Colorectal Origin for Liver Metastatic  
609 Adenocarcinomas. *EBioMedicine* 28, 62-69. doi: 10.1016/j.ebiom.2018.01.001.
- 610 Zhou, Y., Tozzi, F., Chen, J., Fan, F., Xia, L., Wang, J., et al. (2012). Intracellular ATP levels  
611 are a pivotal determinant of chemoresistance in colon cancer cells. *Cancer research*  
612 72(1), 304-314.
- 613
- 614
- 615
- 616
- 617

618 **Table 1.** Patient characteristics from each dataset

619

|                                       | GSE39582  | GSE37892  | GSE14333  | GSE41258  |
|---------------------------------------|-----------|-----------|-----------|-----------|
| <b>LCC Total (Number of patients)</b> | 75        | 72        | 122       | 75        |
| Women (Number (% of LCC total))       | 31 (41.3) | 34 (47.2) | 45 (38.9) | 37 (49.3) |
| Men (Number (% of LCC total))         | 44 (58.7) | 38 (52.8) | 77 (63.1) | 38 (50.7) |
|                                       |           |           |           |           |
| <b>RCC Total (Number of patients)</b> | 48        | 57        | 125       | 62        |
| Women (Number (% of RCC total))       | 19 (39.6) | 26 (45.6) | 66 (52.8) | 30 (48.4) |
| Men (Number (% of RCC total))         | 29 (60.4) | 31 (54.4) | 59 (47.2) | 32 (51.6) |

620

621

622

623

624

625

626

627

628

629

630

631

632

633

634

635

636

637

638

639

640

641

642

643

644

645



646 **Table 2.** Mean age of patients compared by sex and cancer anatomical location in each  
 647 dataset (t-test,  $p < 0.05$  statistically significant).

648  
 649

|                 |       | GSE39582          |         | GSE37892          |         | GSE14333          |         | GSE41258          |         |
|-----------------|-------|-------------------|---------|-------------------|---------|-------------------|---------|-------------------|---------|
|                 |       | Mean Age (95% CI) | p-value | Mean Age (95% CI) | p-value | Mean Age (95% CI) | p-value | Mean Age (95% CI) | p-value |
| Cancer Location | Left  | 66.6 (64.0, 69.3) | 0.089   | 67.4 (64.5, 70.3) | 0.401   | 63.0 (60.7, 65.4) | <0.001  | 62.7 (59.6, 65.9) | 0.699   |
|                 | Right | 70.5 (66.8, 74.1) |         | 69.3 (65.8, 72.8) |         | 68.5 (66.4, 70.6) |         | 63.8 (59.8, 67.6) |         |
| Sex             | Women | 67.7 (63.6, 71.8) | 0.752   | 69.7 (66.5, 72.9) | 0.243   | 68.3 (65.9, 70.7) | 0.006   | 62.4 (58.3, 66.5) | 0.523   |
|                 | Men   | 68.4 (66.1, 70.8) |         | 67.0 (63.9, 70.2) |         | 63.8 (61.6, 65.9) |         | 64.0 (61.2, 66.8) |         |

650  
 651  
 652  
 653  
 654  
 655  
 656  
 657  
 658  
 659  
 660  
 661  
 662  
 663  
 664  
 665  
 666  
 667  
 668  
 669  
 670  
 671  
 672  
 673

674 **Table 3.** Differential expression of genes in colon tumor from women with RCC compared to  
 675 women with LCC that reproducibly occur in two or more datasets. Log2 fold changes displayed  
 676 are with respect to women with RCC. \*Also, differentially regulated in men with RCC  
 677 compared to men with LCC.

678

| Gene Symbol | GSE14333 |                  | GSE41258 |                  | GSE39582 |                  |
|-------------|----------|------------------|----------|------------------|----------|------------------|
|             | q-value  | Log2 fold change | q-value  | Log2 fold change | q-value  | Log2 fold change |
| ACOT8       |          |                  | 7.88E-02 | -0.36            | 3.41E-02 | -0.09            |
| ACSF2       |          |                  | 3.06E-02 | -0.76            | 6.77E-02 | -0.06            |
| ACSL6       |          |                  | 7.88E-02 | -0.34            | 3.47E-02 | -0.18            |
| ARFGEF2     |          |                  | 4.77E-02 | -0.42            | 8.32E-02 | -0.06            |
| ARID3A      |          |                  | 4.77E-02 | -1.06            | 3.35E-02 | -0.12            |
| ASXL1       |          |                  | 4.77E-02 | -0.34            | 4.65E-02 | -0.06            |
| CASP6       |          |                  | 9.15E-02 | -0.36            | 7.55E-02 | -0.03            |
| CBFA2T2     |          |                  | 9.39E-02 | -0.34            | 1.00E-01 | -0.06            |
| CD24        |          |                  | 7.88E-02 | -0.67            | 6.15E-02 | -0.04            |
| GGH         |          |                  | 9.29E-02 | -0.74            | 2.25E-02 | -0.07            |
| HOXB13      | 2.17E-02 | -0.34            |          |                  | 9.62E-02 | -0.10            |
| HOXC6*      | 2.73E-03 | 0.18             | 9.88E-02 | 1.02             | 1.10E-02 | 0.30             |
| KIF3B       |          |                  | 8.07E-02 | -0.43            | 7.51E-02 | -0.04            |
| MUC12*      | 5.83E-02 | -0.34            |          |                  | 4.65E-02 | -0.18            |
| NEU1        |          |                  | 3.06E-02 | -0.62            | 4.25E-02 | -0.06            |
| PDE3A       | 4.43E-02 | -0.15            |          |                  | 6.51E-02 | -0.10            |
| PFDN4       |          |                  | 9.48E-02 | -0.38            | 3.90E-02 | -0.04            |
| PLAGL2      |          |                  | 4.77E-02 | -0.60            | 2.25E-02 | -0.09            |
| PNPLA3      |          |                  | 9.15E-02 | 0.44             | 3.35E-02 | 0.11             |
| POFUT1      |          |                  | 7.88E-02 | -0.67            | 4.25E-02 | -0.07            |
| PRAC1*      | 9.26E-13 | -0.56            |          |                  | 2.35E-04 | -0.49            |
| RNF43       |          |                  | 9.83E-02 | -0.76            | 8.21E-02 | -0.06            |
| SATB2       |          |                  | 4.77E-02 | -1.32            | 8.31E-02 | -0.18            |
| STAU1       |          |                  | 9.29E-02 | -0.30            | 6.49E-02 | -0.03            |
| TGIF2       |          |                  | 9.48E-02 | -0.38            | 2.68E-03 | -0.12            |
| TLE2        |          |                  | 9.29E-02 | -0.64            | 2.44E-02 | -0.12            |
| TNNC2       |          |                  | 5.93E-02 | -1.89            | 2.78E-02 | -0.10            |
| TSPAN6      |          |                  | 9.39E-02 | -0.42            | 1.57E-03 | -0.07            |
| TTI1        |          |                  | 4.77E-02 | -0.49            | 6.14E-02 | -0.06            |
| VPS53       | 9.56E-02 | 0.08             |          |                  | 7.27E-02 | 0.04             |

679

680

681

682 **Table 4.** Differential expression of genes in colon tumors from men with RCC compared to  
683 men with LCC across three datasets, that reproducibly occur in two or more datasets. Log 2-  
684 fold changes displayed are with respect to men with RCC. \* Genes that are also differentially  
685 regulated in women with RCC when compared to women with LCC.

686

| Gene Symbol | GSE14333 |                  | GSE41258 |                  | GSE39582 |                  |
|-------------|----------|------------------|----------|------------------|----------|------------------|
|             | q-value  | Log2 fold change | q-value  | Log2 fold change | q-value  | Log2 fold change |
| HOXC6*      | 5.57E-04 | 0.26             | 3.21E-02 | 1.29             | 1.80E-06 | 0.36             |
| INSL5       | 1.29E-02 | -0.36            |          |                  | 5.46E-02 | -0.15            |
| MUC12*      | 9.46E-02 | -0.29            |          |                  | 2.62E-02 | -0.18            |
| PRAC1*      | 3.83E-12 | -0.49            |          |                  | 1.61E-03 | -0.42            |
| ZNF345      |          |                  | 9.47E-02 | -0.69            | 7.84E-02 | -0.04            |
| ZNF813      |          |                  | 9.47E-02 | -0.49            | 2.39E-02 | -0.14            |

687

688

689

690

691

692

693

694

695

696

697

698

699

700

701

702

703

704

705

706

707

708

709

710 **Table 5.** Differential expression of genes in colon tumor from women with RCC compared to  
 711 men with RCC that reproducibly occur in two or more datasets. Log2 fold changes displayed  
 712 are with respect to women with RCC.

713

| Gene Symbol | GSE14333 |                  | GSE41258 |                  | GSE39582 |                  | GSE37892 |                  |
|-------------|----------|------------------|----------|------------------|----------|------------------|----------|------------------|
|             | q-value  | Log2 fold change | q-value  | Log2 fold change | q-value  | Log2 fold change | q-value  | Log2 fold change |
| DDX3Y       | 1.54E-25 | -0.49            | 3.32E-17 | -4.06            | 1.04E-08 | -0.38            | 5.36E-11 | -0.76            |
| EIF1AX      | 5.79E-04 | 0.03             | 4.46E-04 | 0.54             |          |                  |          |                  |
| EIF1AY      | 7.03E-39 | -1.25            | 1.69E-11 | -3.18            | 2.63E-09 | -0.84            | 1.22E-09 | -1.32            |
| KDM5D       | 3.70E-20 | -0.45            | 9.26E-13 | -3.47            | 1.04E-08 | -0.60            | 5.36E-11 | -1.25            |
| PRKX        | 8.22E-04 | 0.06             | 6.48E-02 | 0.42             |          |                  | 3.11E-02 | -0.27            |
| PRKY        | 2.27E-02 | -0.06            | 9.63E-03 | -0.49            |          |                  |          |                  |
| PUDP        | 2.29E-02 | 0.03             | 1.33E-02 | 0.59             |          |                  |          |                  |
| RPS4X       | 2.29E-02 | 0.00             | 1.25E-03 | 0.21             |          |                  |          |                  |
| RPS4Y1      | 4.02E-29 | -0.51            | 1.75E-13 | -6.64            | 2.20E-09 | -0.47            | 2.44E-12 | -1.56            |
| TTY15       | 2.27E-06 | -0.27            | 1.23E-08 | -0.86            | 8.10E-05 | -0.27            |          |                  |
| TXLNGY      | 4.75E-31 | -0.67            | 1.10E-11 | -4.06            | 4.99E-07 | -0.49            | 2.71E-08 | -0.97            |
| USP9Y       | 1.11E-29 | -1.00            | 4.79E-10 | -1.22            |          |                  | 2.97E-03 | -0.54            |
| UTY         | 3.09E-15 | -0.36            |          |                  |          |                  | 4.43E-05 | -0.34            |
| XIST        | 3.80E-49 | 0.81             | 1.97E-25 | 6.06             | 2.14E-08 | 0.57             | 1.16E-16 | 1.58             |
| ZFX         | 9.29E-02 | 0.04             |          |                  |          | -0.38            | 1.56E-02 | 0.12             |
| ZFY         | 1.58E-23 | -0.84            | 2.24E-02 | -0.42            |          |                  | 1.87E-06 | -0.54            |

714

715

716

717

718

719

720

721

722

723

724

725

726

727

728

729

730

731

732

733 **Table 6.** Differential expression of genes in colon tumors from women with LCC compared to  
 734 men with LCC across four datasets, that reproducibly occur in two or more datasets. Fold  
 735 changes displayed are with respect to women with LCC. \* Genes that are also differentially  
 736 regulated in women with RCC when compared to men with RCC.

737  
 738

| Gene Symbol | GSE14333 |                  | GSE41258 |                  | GSE39582 |                  | GSE37892 |                  |
|-------------|----------|------------------|----------|------------------|----------|------------------|----------|------------------|
|             | q-value  | Log2 fold change | q-value  | Log2 fold change | q-value  | Log2 fold change | q-value  | Log2 fold change |
| DDX3Y*      | 4.89E-22 | -0.45            | 5.29E-16 | -3.18            | 1.05E-22 | -0.45            | 8.76E-17 | -0.76            |
| EIF1AX*     | 1.13E-02 | 0.01             | 2.11E-06 | 0.61             | 2.82E-02 | 0.08             |          |                  |
| EIF1AY*     | 2.50E-26 | -1.09            | 3.44E-10 | -2.56            | 4.04E-18 | -1.00            | 3.42E-17 | -1.36            |
| KDM5C       |          |                  | 2.11E-02 | 0.33             | 6.15E-02 | 0.08             |          |                  |
| KDM5D*      | 4.10E-18 | -0.47            | 2.92E-12 | -2.56            | 2.03E-21 | -0.86            | 3.42E-17 | -1.25            |
| KDM6A       | 4.70E-03 | 0.11             | 4.34E-06 | 0.45             | 4.21E-04 | 0.14             |          |                  |
| NLGN4Y      | 2.43E-07 | -0.49            | 3.61E-02 | -0.34            | 1.27E-03 | -0.09            |          |                  |
| PRKY*       |          |                  | 2.10E-03 | -0.47            | 3.05E-05 | -0.18            |          |                  |
| PUDP*       | 2.99E-03 | 0.04             | 5.31E-03 | 0.58             | 2.74E-06 | 0.12             |          |                  |
| RPS4X*      |          |                  | 3.69E-05 | 0.20             | 8.57E-03 | 0.01             |          |                  |
| RPS4Y1*     | 1.73E-21 | -0.49            | 5.70E-13 | -5.64            | 3.20E-26 | -0.92            | 9.60E-21 | -1.51            |
| TMSB4Y      |          |                  |          |                  | 2.17E-02 | -0.06            | 1.40E-02 | -0.14            |
| TSIX        | 1.57E-15 | 0.70             |          |                  | 5.14E-08 | 0.28             |          |                  |
| TTY14       | 1.68E-02 | -0.29            |          |                  | 6.25E-05 | -0.17            |          |                  |
| TTY15*      | 2.71E-05 | -0.20            | 7.99E-07 | -0.56            | 6.12E-07 | -0.27            |          |                  |
| TXLNGY*     | 3.95E-28 | -0.67            | 8.14E-13 | -3.32            | 3.04E-13 | -0.62            | 5.46E-11 | -0.94            |
| USP9Y*      | 3.27E-20 | -0.86            |          |                  | 1.83E-09 | -0.49            | 1.84E-02 | -0.43            |
| UTY*        | 1.09E-11 | -0.34            | 3.12E-06 | -0.81            | 7.07E-10 | -0.23            | 2.40E-06 | -0.36            |
| XIST*       | 9.21E-40 | 0.79             | 1.88E-19 | 4.99             | 3.08E-38 | 1.02             | 4.32E-27 | 1.65             |
| ZFX*        | 6.42E-03 | 0.03             | 2.67E-04 | -0.30            | 6.15E-02 | 0.10             |          |                  |
| ZFY*        | 8.54E-22 | -0.71            | 1.67E-02 | -0.32            | 1.47E-09 | -0.42            | 5.36E-08 | -0.54            |
| ZRSR2       | 2.33E-02 | 0.03             | 2.42E-03 | 0.32             | 7.62E-04 | 0.08             |          |                  |

739  
 740  
 741  
 742  
 743  
 744  
 745  
 746  
 747  
 748  
 749

## 750 **Figure Legends**

751 **Figure 1A.** PCA plot of data from GSE41258 comparing gene expression values from  
752 women with RCC to women with LCC, q-value < 0.1. Principal component 1 explains the  
753 genes that contribute to 41% of the total variance between the two sets of samples. **1B.** PCA  
754 plot of GSE41258 when comparing women with RCC and men with RCC (q-value < 0.1 by  
755 student's t-test). Principal component 1 explains the genes that contribute to 56% of the total  
756 variance between the two patient groups. Supplemental Figure 1 shows PCA scores plots for  
757 the other four datasets.

758 **Figure 2A.** Significantly altered pathways in enrichment analysis when comparing between  
759 women with RCC and to women with LCC. **2B.** Significantly altered pathways in enrichment  
760 analysis when comparing women with RCC to men with RCC, -log (p-value).

761 **Figure 3.** MetaCore generated pathway of differentially expressed genes involved in protein  
762 kinase A (PKA) signaling. Experimental data from all three GSE datasets is linked to and  
763 visualized on the maps as thermometer-like figures. Upward thermometers have red color and  
764 indicate upregulated signals and downward (blue) ones indicate downregulated expression  
765 levels of the genes. Annotation are listed in supplemental materials.

766 **Figure 4.** MetaCore-generated pathway showing differentially expressed genes involved in  
767 sirtuin 6 regulation and function. Experimental data from all three GSE datasets are linked to  
768 and visualized on the maps as thermometer-like figures. Up-ward thermometers have red color  
769 and indicate up-regulated signals and down-ward (blue) ones indicate down-regulated  
770 expression levels of the genes. Annotation are listed in supplemental materials.

771 **Figure 5.** MetaCore-generated pathway showing differentially expressed genes involved in  
772 carbohydrate-responsive element-binding protein (ChREBP) regulation. Experimental data  
773 from all three GSE datasets are linked to and visualized on the maps as thermometer-like  
774 figures. Up-ward thermometers have red color and indicate up-regulated signals and  
775 down-ward (blue) ones indicate down-regulated expression levels of the genes. Annotation  
776 are listed in supplemental materials.

777 **Figure 6.** MetaCore-generated pathway showing differentially expressed genes involved in  
778 mammalian target of rapamycin complex 1 (mTORC1) regulation. Experimental data from all  
779 three GSE datasets are linked to and visualized on the maps as thermometer-like figures.  
780 Up-ward thermometers have red color and indicate up-regulated signals and down-ward (blue)  
781 ones indicate down-regulated expression levels of the genes. Annotation are listed in  
782 supplemental materials.

783 **Figure 7.** MetaCore-generated pathway showing differentially expressed genes involved in  
784 ATP metabolism. Experimental data from all three GSE datasets are linked to and visualized  
785 on the maps as thermometer-like figures. Up-ward thermometers have red color and indicate  
786 up-regulated signals and down-ward (blue) ones indicate down-regulated expression levels of  
787 the genes. Annotation are listed in supplemental materials.

788 **Figure 8.** MetaCore-generated pathway differentially expressed genes involved in Antigen  
789 presentation by major histocompatibility complex (MHC) class I: cross-presentation.  
790 Experimental data from all three GSE datasets are linked to and visualized on the maps as

791 thermometer-like figures. Up-ward thermometers have red color and indicate up-regulated  
792 signals and down-ward (blue) ones indicate down-regulated expression levels of the genes.  
793 Annotation are listed in supplemental materials.

794 **Figure 9. Pathway analysis by Ingenuity Pathway Analysis (IPA).** Top IPA network “Cell  
795 Morphology, Cell Death, and Survival, Cancer” (Fisher Exact Test  $p < 1 \times 10^{-48}$ ) generated  
796 from the differentially expressed genes between women with RCC vs LCC (Table 3).  
797 Molecules colored in green are downregulated, red-colored are upregulated. Molecules in white  
798 are added by the IPA network generating algorithm to complete the network.

799

800

801

802

803

804

805

806

807

808

809

810

811

812

813

814

815

816

817

818

819

820

821

822

823

824

825

826 **Figure 1.**

827

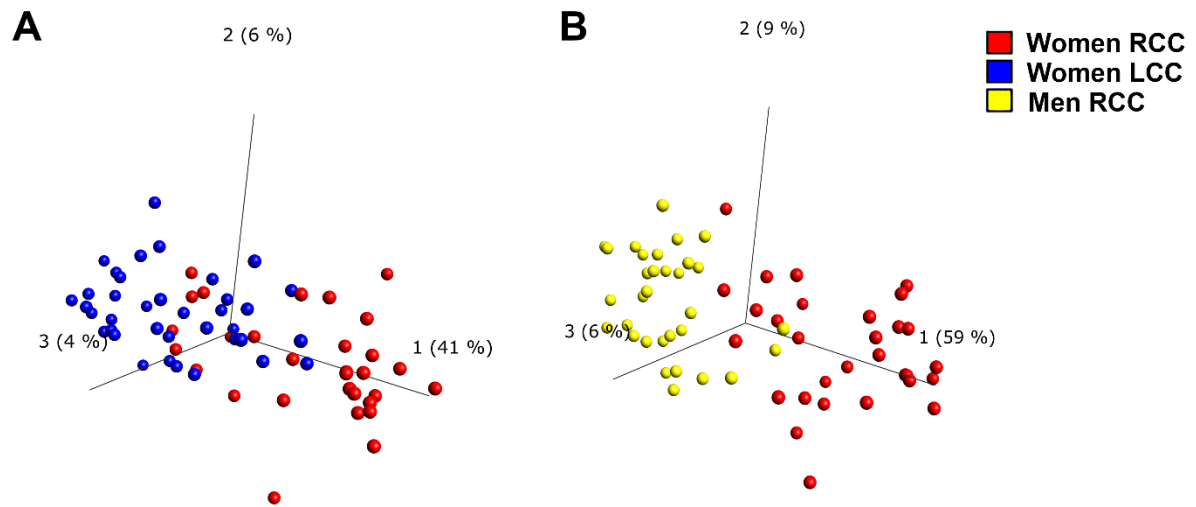

828

829

830

831

832

833

834

835

836

837

838

839

840

841

842

843

844

845

846

847

848



849 **Figure 2.**

850

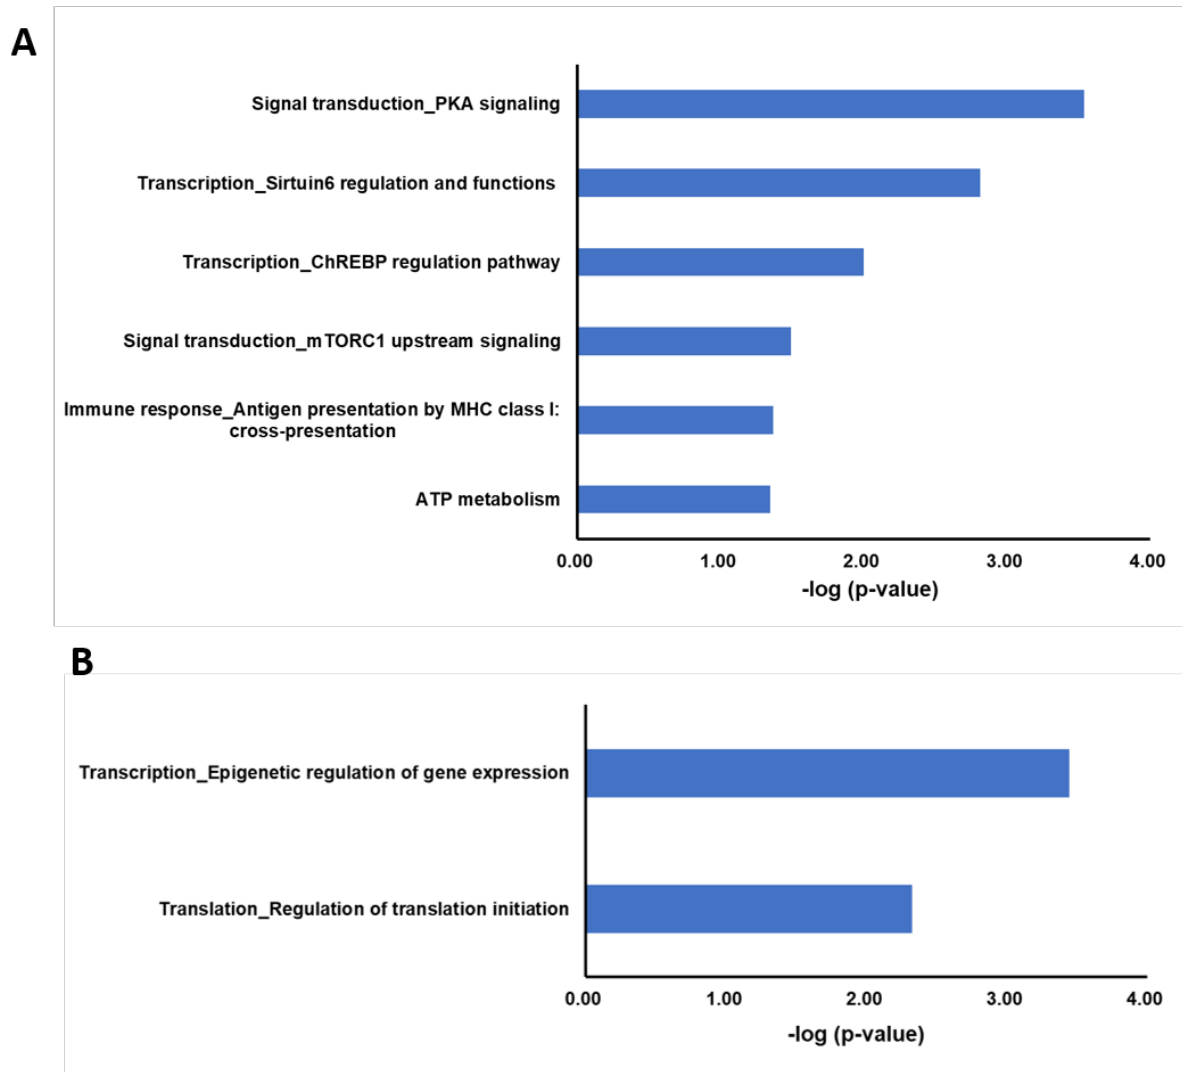

851

852

853

854

855

856

857

858

859

860

861

862

863 **Figure 3.**

864

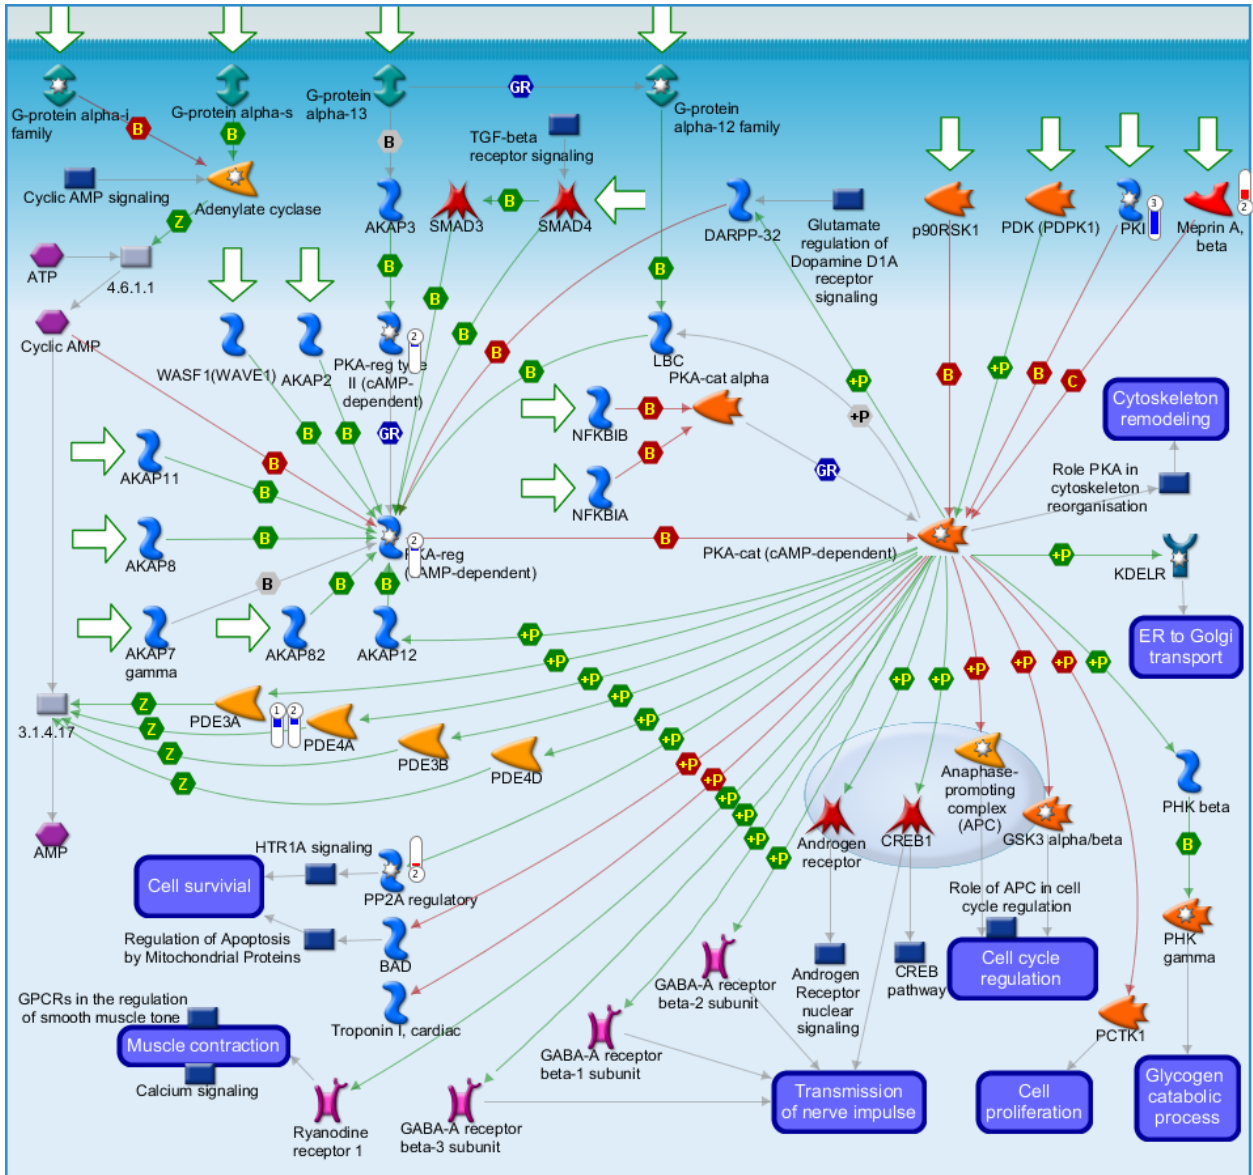

865

866

867

868

869

870

871

872

873

874

875 **Figure 4**

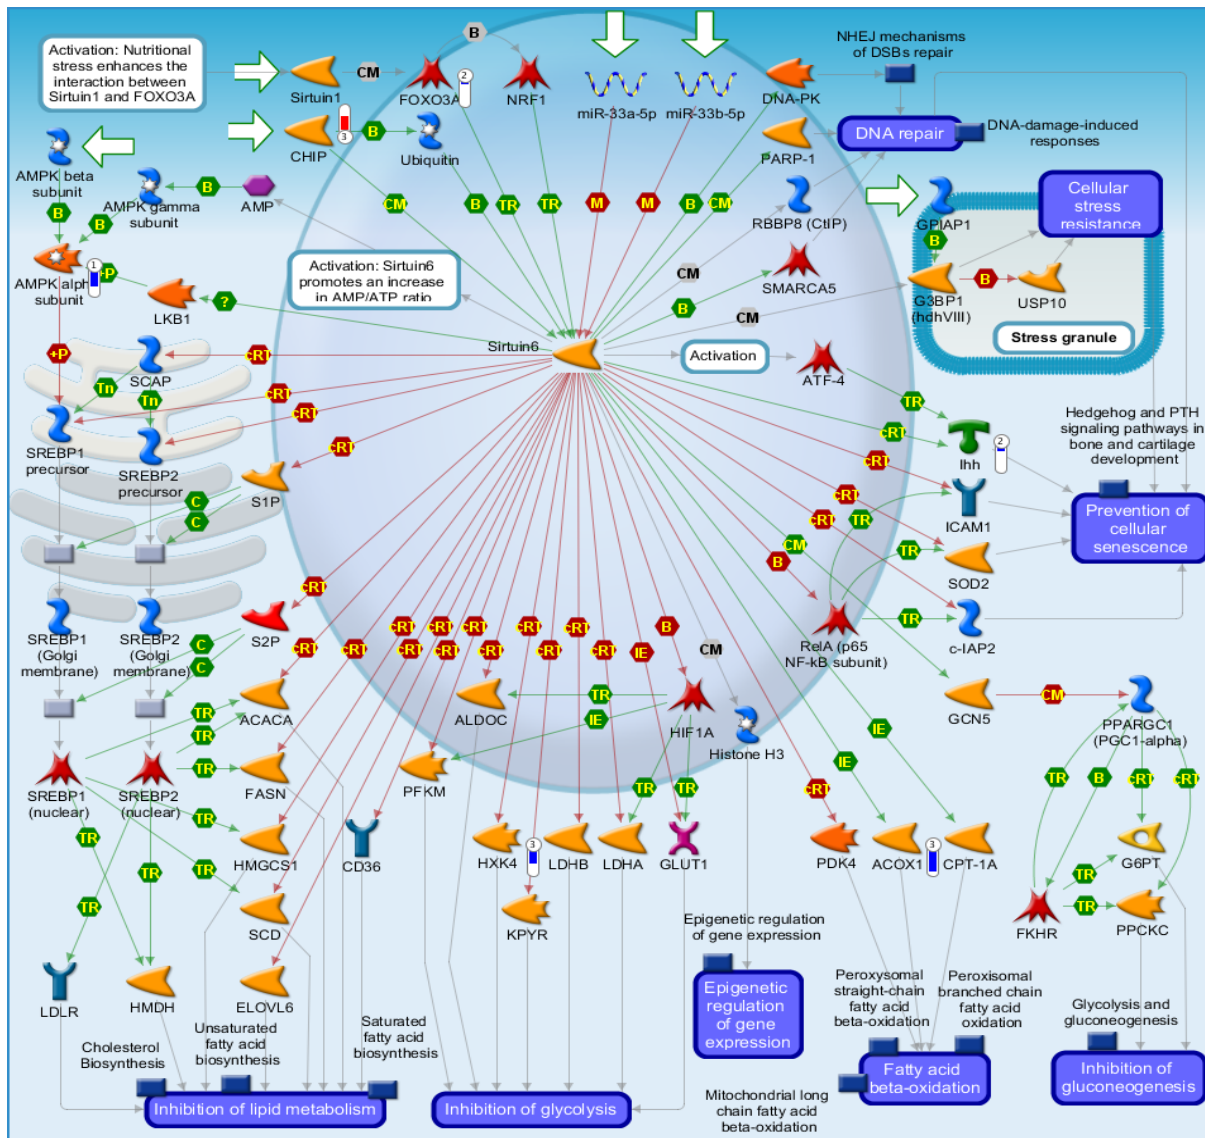

876

877

878

879

880

881

882

883

884

885

886

887

888 **Figure 5.**

889

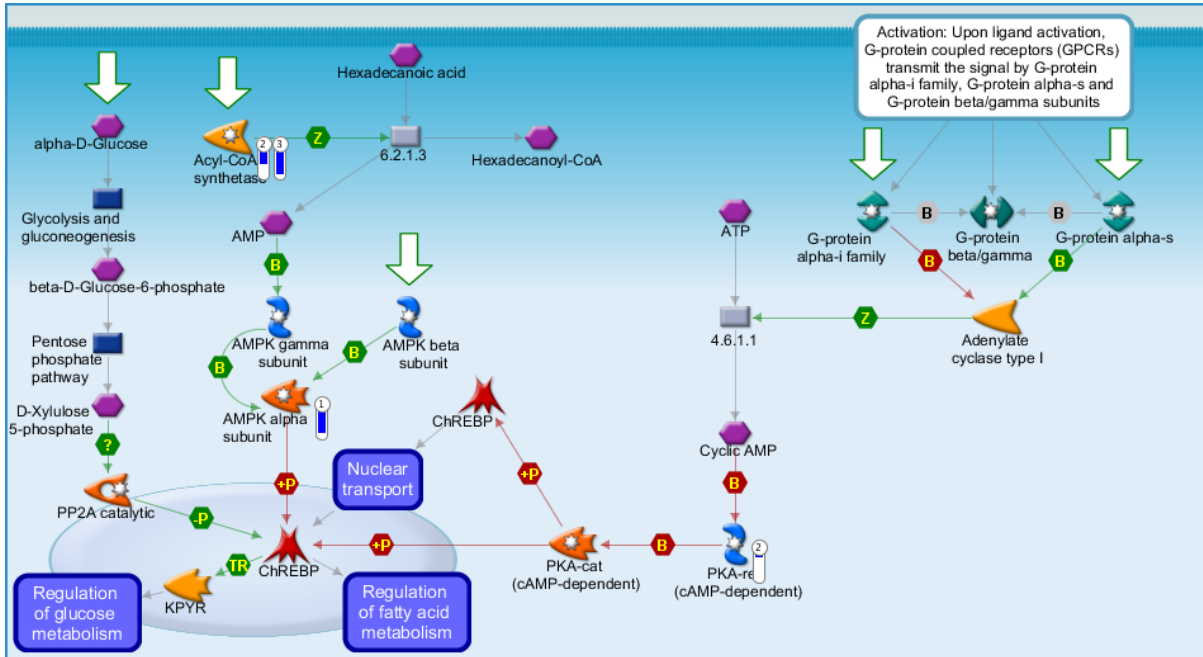

890

891

892

893

894

895

896

897

898

899

900

901

902

903

904

905

906

907

908

909

910

911

912

913

914

915 **Figure 6.**

916

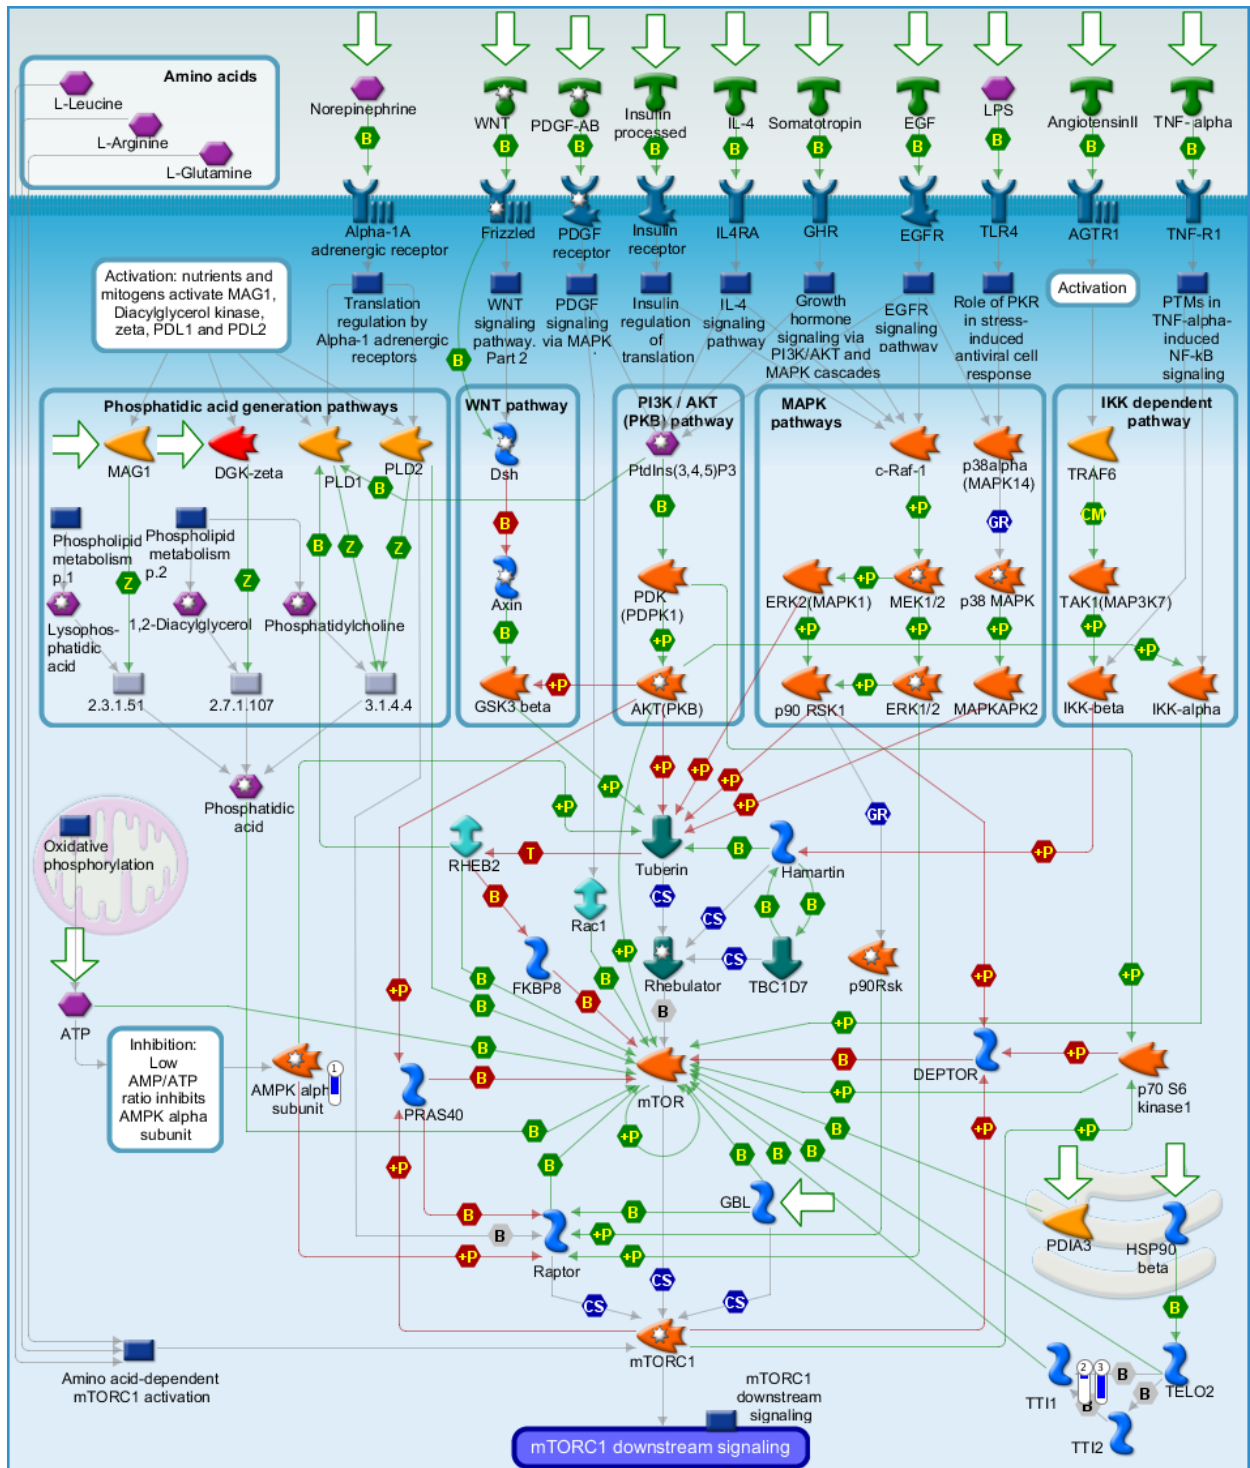

917

918

919

920

921

922

923



933 **Figure 8.**

934

935

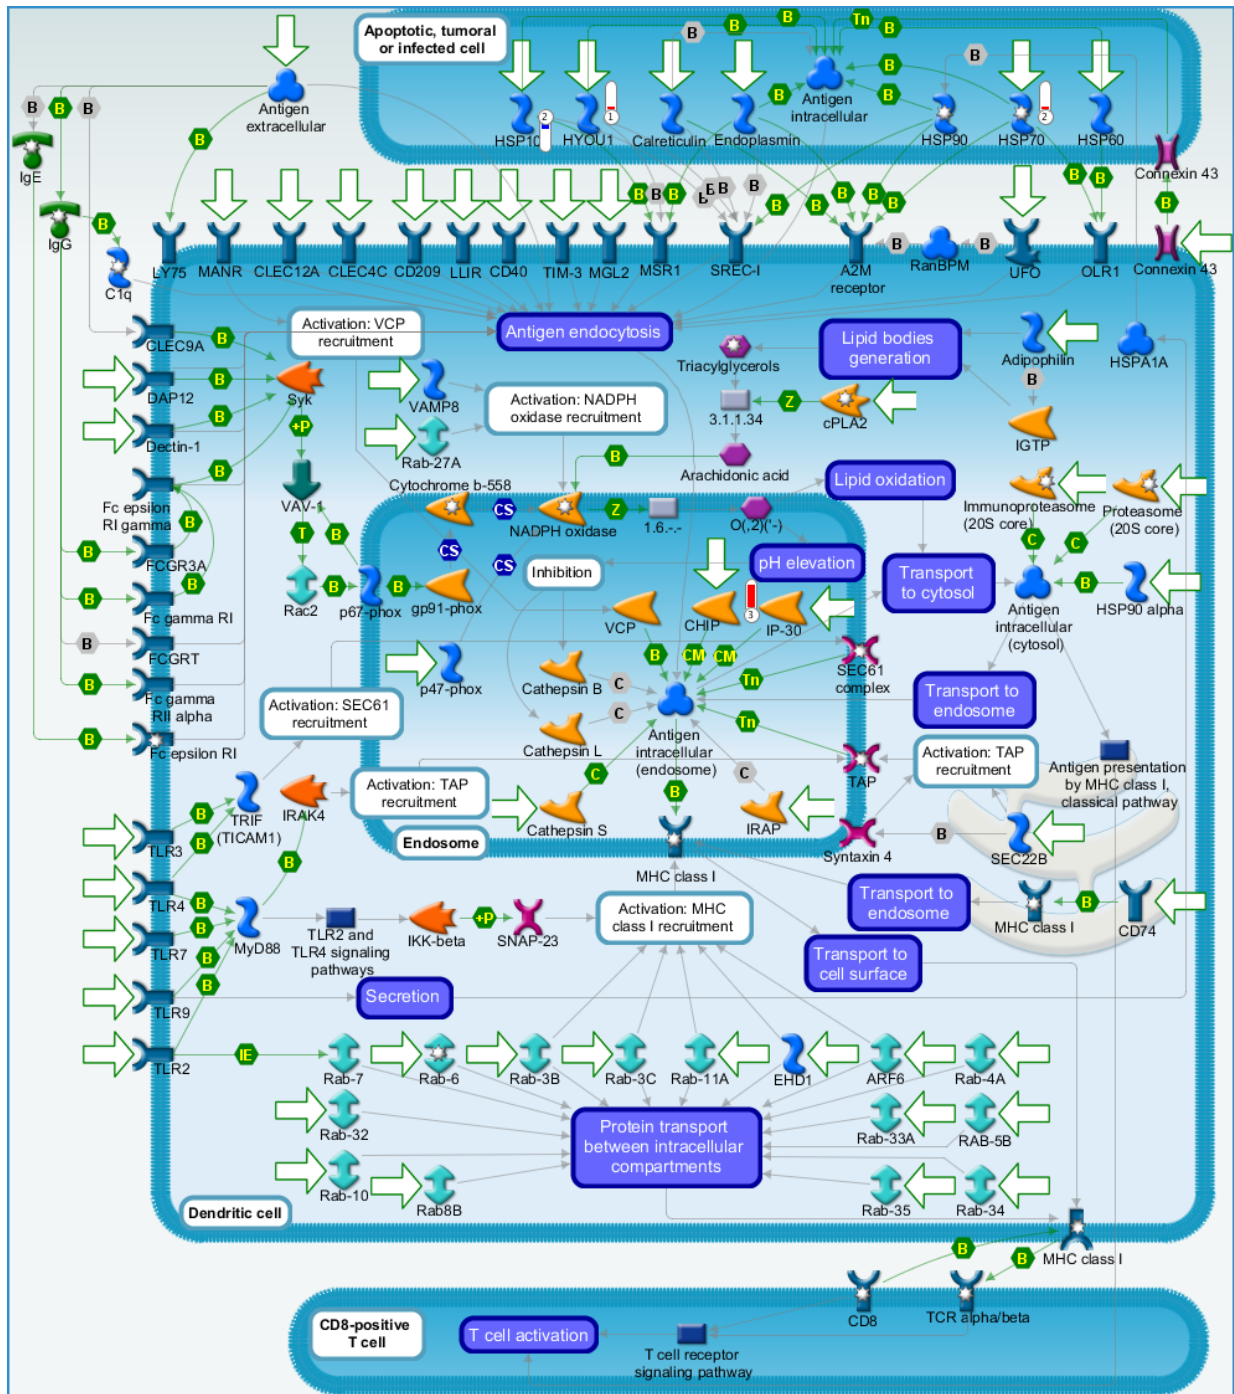

936

937

938

939

940

941

942

943 **Figure 9.**

944

945

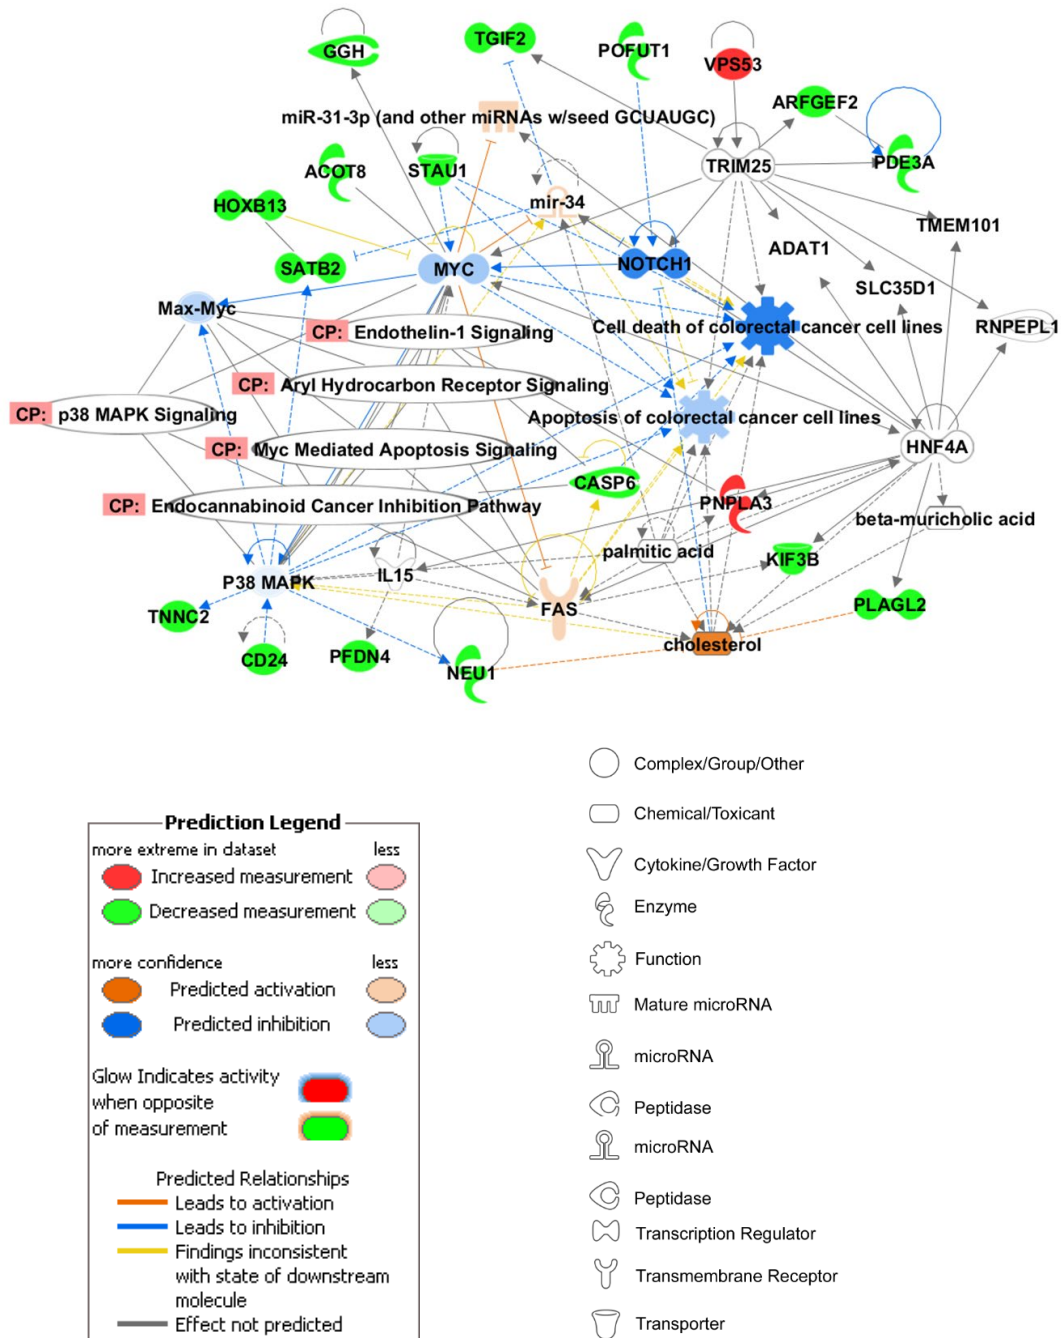

Source: https://www.biorxiv.org/content/10.1101/659151v1.full.pdf
